# Supplementary material for: Age Dependency of GLI Reference Values Compared with Paediatric Lung Function Data in Two German Studies (GINIplus and LUNOKID)
Source: PLOS journal article supplement (doi:10.1371/journal.pone.0159678), 2016-07-20
Supplement: S1 (10.1371/journal.pone.0159678.s001) [file journal.pone.0159678.s001.PDF › journal.pone.0159678.s001.PDF]

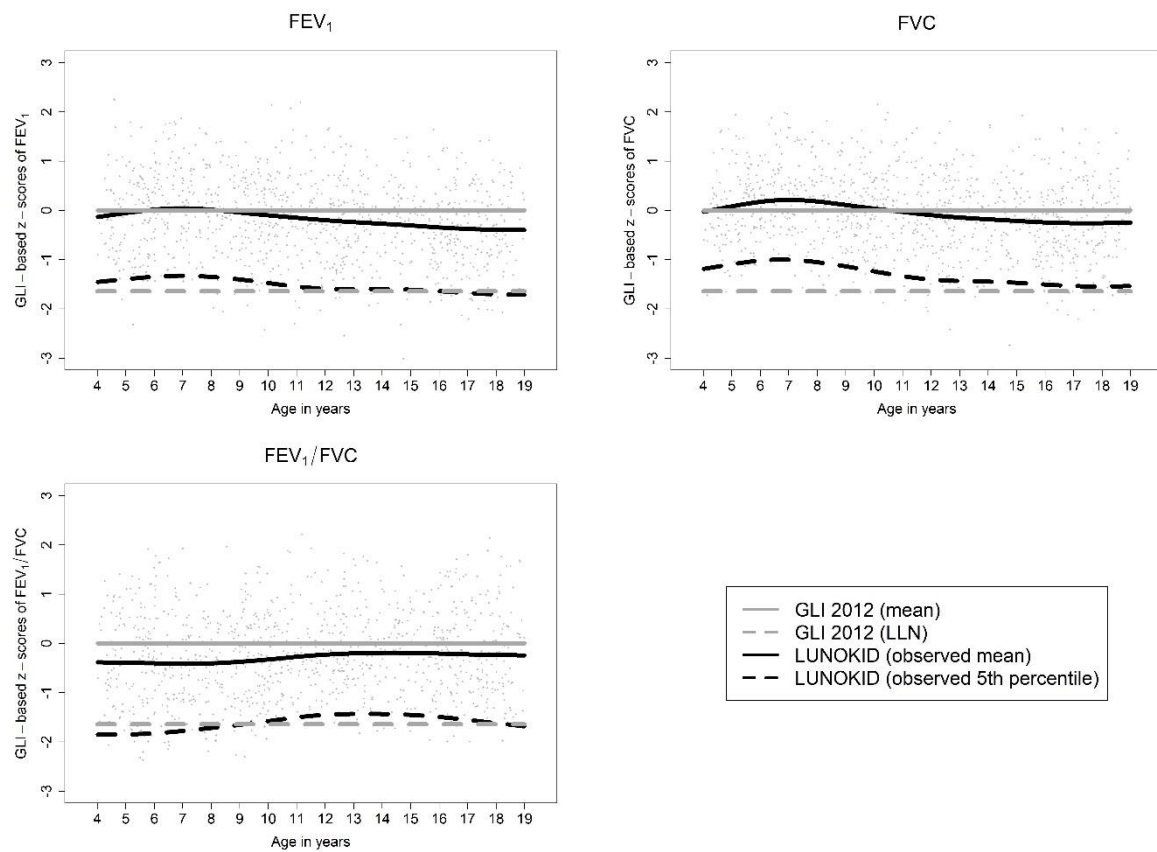

**S1 Fig. Comparison of the GLI-z-scores (mean and lower limit of normal (LLN)) with these observed in girls from the LUNOKID data.**
