# Supplementary material for: Age Dependency of GLI Reference Values Compared with Paediatric Lung Function Data in Two German Studies (GINIplus and LUNOKID)
Source: PLOS journal article supplement (doi:10.1371/journal.pone.0159678), 2016-07-20
Supplement: S2 (10.1371/journal.pone.0159678.s002) [file journal.pone.0159678.s002.PDF › journal.pone.0159678.s002.PDF]

**S1 Table. GINIplus (sensitivity analysis): GLI- and LUNOKID-based z-scores of all lung healthy 15-year old participants (All), participants without a respiratory tract infection in the last 2-4 weeks and participants with no nutritional intervention in the first months of life.**

|                                           |                            | GLI  |                        |           | LUNOKID                |         |
|-------------------------------------------|----------------------------|------|------------------------|-----------|------------------------|---------|
|                                           |                            | N    | mean (sd) <sup>a</sup> | %≤LLN     | mean (sd) <sup>a</sup> | %≤LLN   |
| <b>All (main analysis)</b>                | <b>FEV<sub>1</sub></b>     | 1032 | -0.58 (0.87)           | 11.5% *** | 0.02 (1.12) ***        | 7.3% *  |
|                                           | <b>FVC</b>                 | 1029 | -0.57 (0.85)           | 10.9% *** | -0.12 (1.06) ***       | 8.0% ** |
|                                           | <b>FEV<sub>1</sub>/FVC</b> | 1038 | -0.04 (0.97) ***       | 5.4%      | 0.28 (1.17) ***        | 6.2%    |
| <b>No infection in the last 2-4 weeks</b> | <b>FEV<sub>1</sub></b>     | 913  | -0.59 (0.87)           | 11.7% *** | 0.01 (1.12) ***        | 7.3%    |
|                                           | <b>FVC</b>                 | 911  | -0.57 (0.85)           | 10.9% *** | -0.11 (1.06) ***       | 7.8% *  |
|                                           | <b>FEV<sub>1</sub>/FVC</b> | 918  | -0.04 (0.96) ***       | 5.1%      | 0.27 (1.16) ***        | 6.0%    |
| <b>No nutritional intervention</b>        | <b>FEV<sub>1</sub></b>     | 549  | -0.60 (0.85)           | 11.7% *** | 0.00 (1.09) ***        | 6.7%    |
|                                           | <b>FVC</b>                 | 548  | -0.61 (0.85)           | 12.6% *** | -0.18 (1.07) ***       | 8.8% *  |
|                                           | <b>FEV<sub>1</sub>/FVC</b> | 551  | 0.01 (0.97) ***        | 4.4%      | 0.33 (1.17) **         | 5.1%    |

<sup>a</sup> Two one-sided tests (TOST) for equivalence. Fit is sufficient if the null-hypothesis of a mean z-score outside of the interval [-0.5, 0.5] is rejected (\*: p<0.05, \*\*: p<0.01, \*\*\*: p<0.001).
